# Supplementary material
Source: publisher figshare collection journal article supplement (https://acs.figshare.com/ndownloader/files/4598239)
Supplement: Supplementary file 1 [file 4598239]

## Supporting Information

### Efficient Photocatalytic Degradation of Gaseous Acetaldehyde by Highly Ordered TiO<sub>2</sub> Nanotube Arrays

*Zhaoyue Liu<sup>†</sup>, Xintong Zhang, Shunsuke Nishimoto, Taketoshi Murakami, Akira Fujishima\**

Photocatalyst Group, Special Research Laboratory for Optical Science, Kanagawa Academy of Science and Technology, KSP Building West 614, 3-2-1 Sakado, Takatsu-ku, Kawasaki, Kanagawa 213-0012, Japan

Fax: +81-44-819-2038; Tel: +81-44-819-2020

E-mail: [fujishima@newkast.or.jp](mailto:fujishima@newkast.or.jp)

<sup>†</sup> Present Address: Chemical and Metallurgical Engineering, University of Nevada, Reno, Nevada, USA.

Total number of pages: 6

Number of Figures: 5

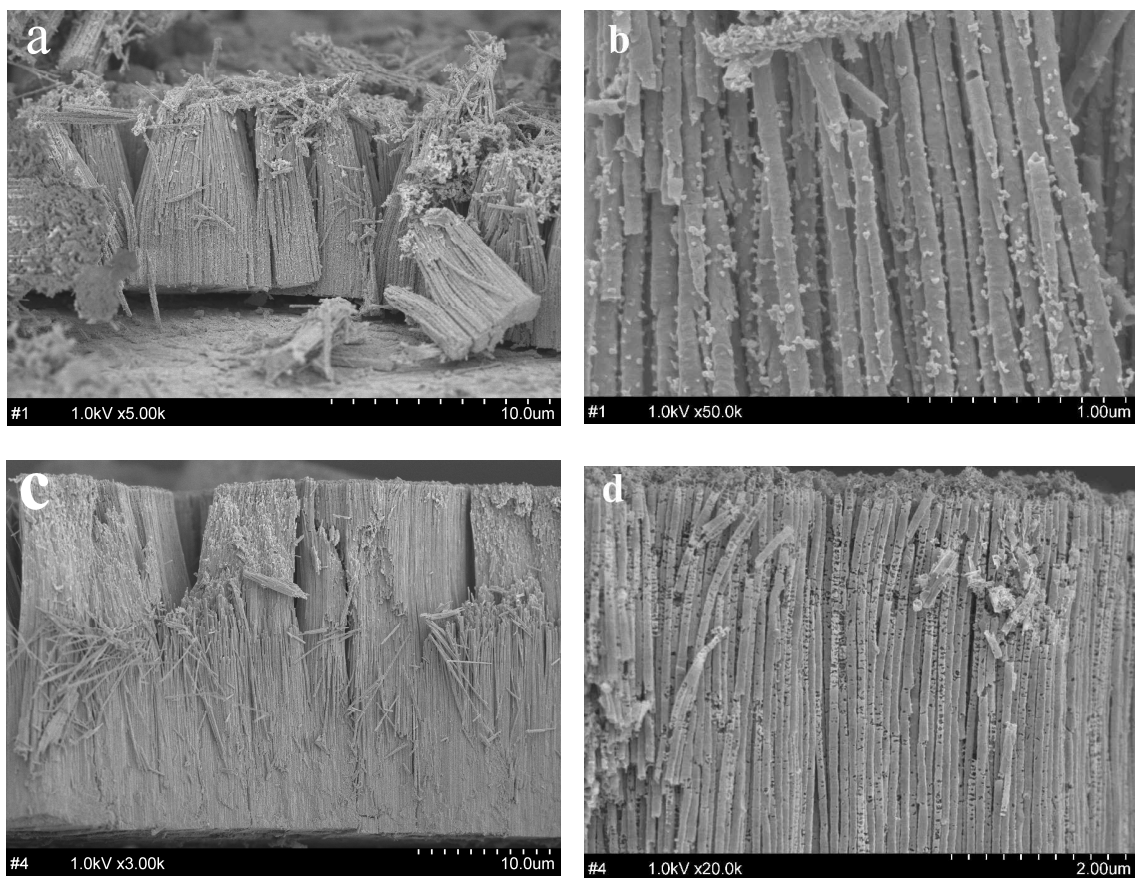

Figure S1. Cross-sectional images of  $\text{TiO}_2$  nanotube arrays prepared by anodizing Ti foil at 20 V in formamide-based electrolyte for 1 h (a, b) and 12 h (c, d)

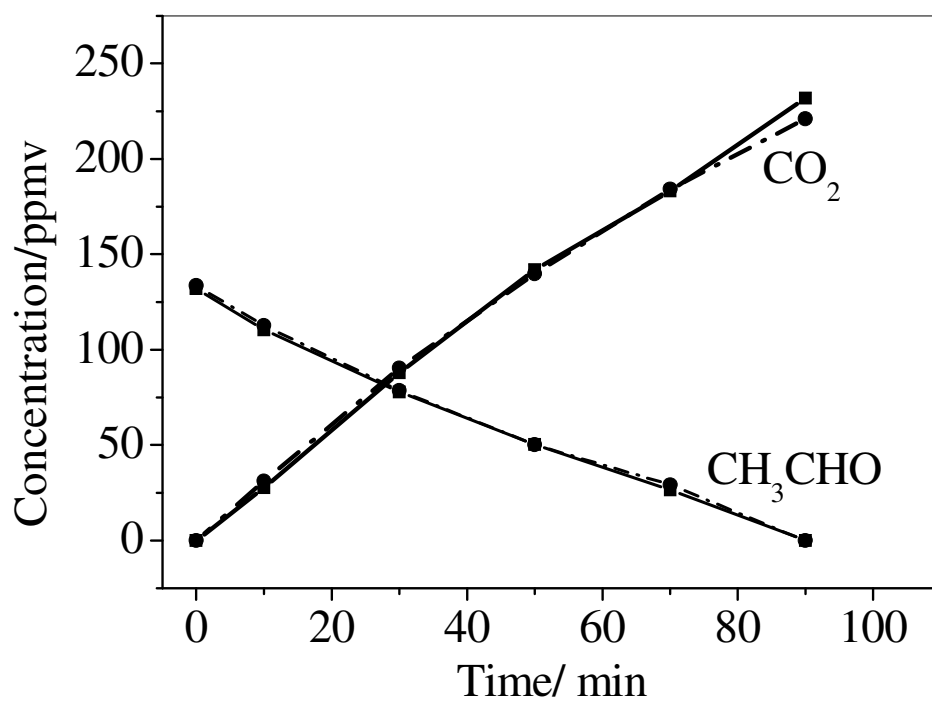

Figure S2. Plots of the change in acetaldehyde and  $\text{CO}_2$  concentration vs. irradiation time for decomposing about 130 ppmv acetaldehyde by  $\text{TiO}_2$  nanotube arrays with length of  $17\ \mu\text{m}$  (dotted line) and  $27\ \mu\text{m}$  (solid line).

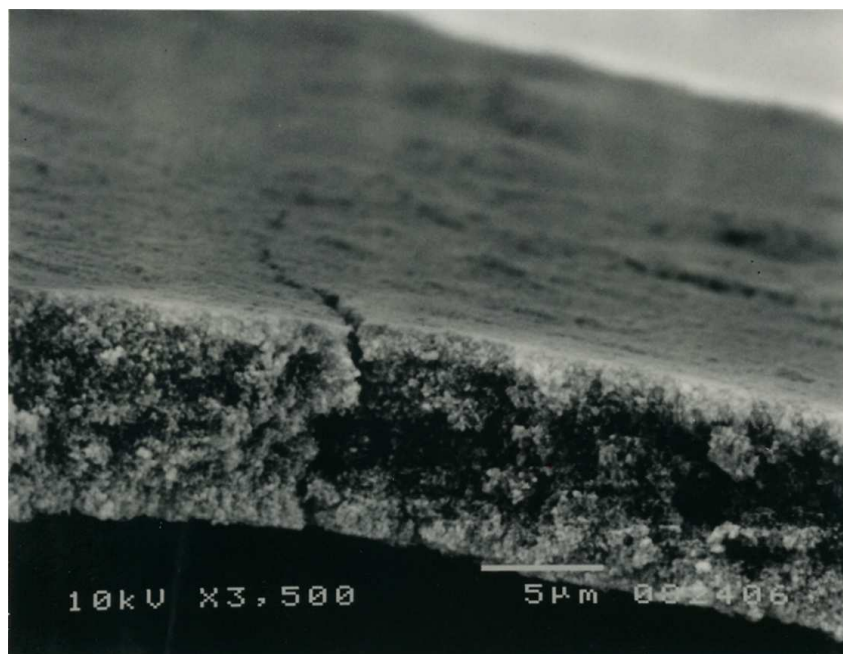

Figure S3. Cross-sectional image of P25 TiO<sub>2</sub> nanoparticulate film

P25 TiO<sub>2</sub> nanoparticulate film was deposited on the titanium foil substrate by a doctor-blade method using a slurry of 20 % P25 TiO<sub>2</sub> in ethanol (which is similar to the reported method <sup>1, 2</sup>), however, without a posttreatment of pressing. The as-prepared film was dried in room temperature.

(1) Lindström H.; Holmberg, A.; Magnusson, E.; Lindquist, S. E.; Malmqvist, L.; Hagfeldt, A. *Nano Lett.* 2001, **1**, 97.

(2) Lindström H.; Holmberg, A.; Magnusson, E.; Malmqvist, L.; Hagfeldt, A. *J. Photochem. Photobiol. A: Chem.* 2001, **145**, 107.



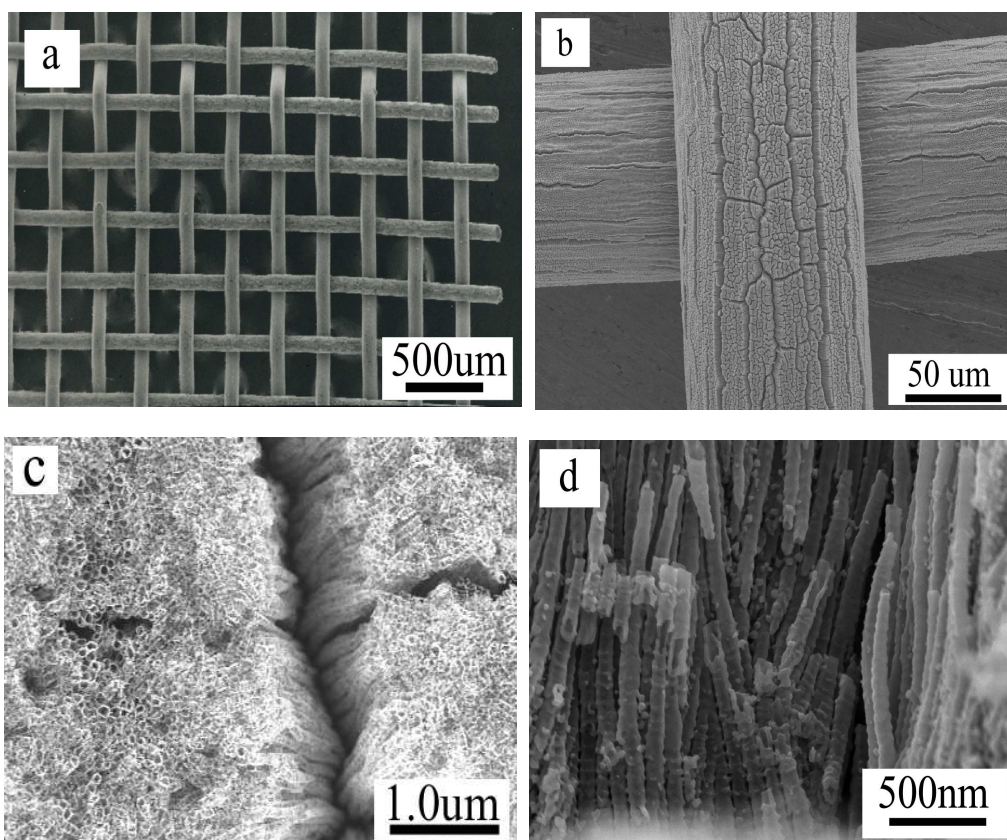

Figure S4. Top view (a, b, c) and cross-sectional (d) images of TiO<sub>2</sub> nanotube array on titanium mesh (80 meshes, Nilaco, Japan) by anodizing Ti mesh at 20 V for 1 h in formamide-based electrolyte.

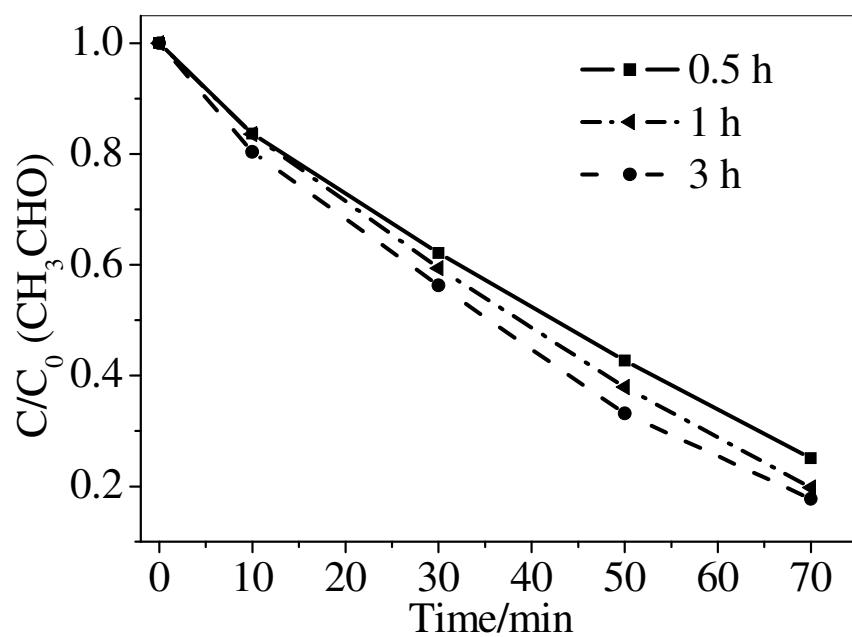

Figure S5. Photocatalytic degradation of gaseous acetaldehyde (approximate 130 ppmv) in a batch type reactor by TiO<sub>2</sub> nanotube arrays on titanium mesh (80 meshes) fabricated at 0.5, 1 and 3 h of anodization in formamide-based electrolyte.
